# Supplementary material
Source: ML conference proceedings conference paper supplement (https://openaccess.thecvf.com/content/CVPR2026/html/Si_Revisiting_Sparsity_Constraint_CVPR_2026_paper.html)
Supplement: Supplementary file 1 [file Si_Revisiting_Sparsity_Constraint_CVPR_2026_supplemental.pdf]

# Revisiting Sparsity Constraint Under High-Rank Property in Partial Multi-Label Learning

## Supplementary Material

### 7. Proof of Theorem 1

We here prove the theorem 1 as follows.

By definition, the noise matrix  $\mathbf{N}$  satisfies  $\|\mathbf{N}\|_0 \leq \epsilon$ , which implies that it contains at most  $\epsilon$  non-zero entries. Sparse binary matrices can be approximated as low-rank matrices since their rank is constrained by the number of non-zero entries:

$$\text{rank}(\mathbf{N}) \leq \min(\epsilon, n, l). \quad (19)$$

The rank of the difference of two matrices  $\mathbf{Y}$  and  $\mathbf{N}$  is bounded by the following rank inequality:

$$\text{rank}(\mathbf{Y}_g) = \text{rank}(\mathbf{Y} - \mathbf{N}) \geq \text{rank}(\mathbf{Y}) - \text{rank}(\mathbf{N}). \quad (20)$$

Since  $\mathbf{Y}$  is full rank with  $\text{rank}(\mathbf{Y}) = \min(n, l)$  and  $\text{rank}(\mathbf{N}) \leq \epsilon$ , it follows that:

$$\text{rank}(\mathbf{Y}_g) \geq \min(n, l) - \epsilon. \quad (21)$$

One of our key assumptions is that  $\epsilon$  is a small value that is smaller than  $n$  and  $l$ . Indeed, many real-world datasets have the property of  $n > \epsilon$ , such as the original YeastMF, YeastBP, and YeastCC. Besides, regarding synthetic datasets, the approach described in [21] can also yield extremely sparse noise labels—that is,  $\epsilon$  is much smaller than  $n$ . Moreover, consider more realistic scenarios. For high quality real-world multi-label learning dataset like RCV1-V2, and large scale dataset Amazon-titles with more than 1.3M labels, due to industrial-grade quality control, the noise inevitably introduced during manual labeling but tends to be very sparse, which naturally aligns with our assumption  $\epsilon < l$ .

Therefore, based on the characteristics of widely-used MLL datasets, we find that many cases satisfy  $\epsilon < n, l$ . Our use of this assumption is primarily motivated by the desire to establish a sound theoretical analysis within a constrained and analyzable framework.

### 8. Details of Datasets

We here provide the details of datasets used in our experiments in Table 8.

### 9. Co-occurrence Induced Low-rank Label Matrix

Co-occurrence is a commonly observed phenomenon in multi-label learning (MLL) settings. Specifically, when a

label A always appears together with another label B—i.e., if a sample has label A, it must also have label B—this pattern is referred to as label co-occurrence. Such co-occurrence structures naturally induce a low-rank property in the label matrix, as redundant correlations between labels reduce its effective dimensionality.

To examine the robustness of our method under such conditions, we constructed three variants of the Yeast dataset where the ground-truth label matrix is explicitly made low-rank by introducing artificial co-occurrence relationships among labels. The experimental setup follows the protocol introduced in [20]. We then evaluated three approaches: our proposed method, our method augmented with a low-rank constraint, and NLR [34].

As reported in Table 9, our method consistently and significantly outperforms the other two baselines across all metrics, demonstrating its superior performance and resilience even when the label space exhibits strong low-rank characteristics.

### 10. Limitations

One limitation of this work is that our method has only been evaluated in the context of stand-alone frameworks, without integration into broader deep learning architectures. While the proposed Schirn formulation is designed to be modular and broadly applicable, its effectiveness in more complex or end-to-end neural architectures remains to be explored. In future work, we plan to extend our investigation by applying Schirn to general-purpose deep learning models to further validate its adaptability and more practical utility.

---

#### Algorithm 1 The pseudo code of Schirn

---

- 1: **Input:** partial multi-label dataset  $\mathcal{D}$ , hyper-parameters  $\alpha, \beta$  and  $\lambda$ ;
  - 2: **Output:** The weight matrix  $\mathbf{W}$ ;
  - 3: Initialize  $\mathbf{W} = \mathbf{0}_{d \times l}$ ,  $\mathbf{N} = \mathbf{0}_{n \times l}$ ,  $\mathbf{C} = \mathbf{\Lambda} = \mathbf{1}_{n \times l}$ ,  $\mu = 10^{-4}$ ,  $\mu_{\max} = 10$ ,  $\rho = 1.1$ , and the maximum number of iteration  $iter = 100$ ;
  - 4: **for**  $i = 0$  to  $iter$  **do**
  - 5:   Update  $\mathbf{W}$  according to Eq. (9);
  - 6:   Update  $\mathbf{N}$  according to Eq. (13);
  - 7:   Update  $\mathbf{C}$  according to Eq. (16);
  - 8:   Update  $\mathbf{\Lambda}$  according to Eq. (17);
  - 9:   Update  $\mu$  according to Eq. (18);
  - 10: **end for**
  - 11: **Return Result.**
-

Table 8. Characteristics of real-world datasets. Here,  $n$  represents the number of samples,  $d$  represents the feature dimensions, and  $l$  represents the number of labels. Avg. CLs and Avg. GLs represent the average number of candidate labels per sample and that of ground-truth labels per sample, respectively.

| Type                       | Dataset       | $n$  | $d$  | $l$ | Avg. CLs | Avg. GLs |
|----------------------------|---------------|------|------|-----|----------|----------|
| <b>Real-world Data Set</b> | Music_emotion | 6833 | 98   | 11  | 5.29     | 2.42     |
|                            | Music_style   | 6839 | 98   | 10  | 6.04     | 1.44     |
|                            | YeastMF       | 1408 | 6139 | 39  | 6.54     | 3.54     |
|                            | YeastCC       | 1771 | 6139 | 50  | 9.30     | 4.30     |
|                            | YeastBP       | 3794 | 6139 | 217 | 18.84    | 8.84     |
| <b>Synthetic Data Set</b>  | Scene         | 2407 | 294  | 6   | -        | 1.07     |
|                            | Birds         | 645  | 260  | 19  | -        | 1.01     |
|                            | Medical       | 978  | 1449 | 45  | -        | 1.25     |
|                            | Enron         | 1702 | 1001 | 53  | -        | 3.38     |
|                            | Chess         | 1675 | 585  | 227 | -        | 2.41     |
|                            | Philosophy    | 3971 | 842  | 233 | -        | 2.27     |

Table 9. Comparison of high-rank, low-rank, and NLR settings on Yeast datasets. We report the rank of the label matrix (original and after transformation), average precision ( $\uparrow$ ), one-error ( $\downarrow$ ), ranking loss ( $\downarrow$ ), coverage ( $\downarrow$ ), and hamming loss ( $\downarrow$ ), all in percentage format.

| Dataset  | Condition | rank original | rank new | Avg. Precision $\uparrow$ | One-error $\downarrow$ | Ranking Loss $\downarrow$ | Coverage $\downarrow$ | Hamming Loss $\downarrow$ |
|----------|-----------|---------------|----------|---------------------------|------------------------|---------------------------|-----------------------|---------------------------|
| Yeast-MF | High-rank | 36            | 29       | $51.2 \pm 1.7$            | $48.5 \pm 2.8$         | $24.3 \pm 1.4$            | $43.4 \pm 2.1$        | $11.7 \pm 0.5$            |
|          | Low-rank  | -             | -        | $48.8 \pm 1.3$            | $50.1 \pm 2.2$         | $26.6 \pm 1.6$            | $46.9 \pm 1.9$        | $11.9 \pm 0.6$            |
|          | NLR       | -             | -        | $25.5 \pm 1.1$            | $66.0 \pm 3.5$         | $46.1 \pm 1.7$            | $72.7 \pm 2.2$        | $13.1 \pm 0.6$            |
| Yeast-CC | High-rank | 45            | 37       | $67.3 \pm 2.1$            | $30.6 \pm 2.7$         | $15.2 \pm 1.7$            | $35.6 \pm 2.0$        | $11.4 \pm 0.1$            |
|          | Low-rank  | -             | -        | $65.1 \pm 2.0$            | $32.4 \pm 3.0$         | $16.4 \pm 1.7$            | $37.9 \pm 1.8$        | $10.9 \pm 0.0$            |
|          | NLR       | -             | -        | $24.3 \pm 2.2$            | $72.1 \pm 2.4$         | $44.1 \pm 1.8$            | $76.9 \pm 1.8$        | $13.8 \pm 0.3$            |
| Yeast-BP | High-rank | 200           | 158      | $44.2 \pm 1.0$            | $47.5 \pm 1.6$         | $20.1 \pm 0.2$            | $48.7 \pm 0.7$        | $5.5 \pm 0.1$             |
|          | Low-rank  | -             | -        | $41.6 \pm 1.0$            | $49.2 \pm 2.0$         | $22.2 \pm 0.3$            | $53.4 \pm 1.2$        | $5.4 \pm 0.1$             |
|          | NLR       | -             | -        | $8.8 \pm 1.0$             | $88.5 \pm 2.1$         | $49.3 \pm 4.2$            | $88.8 \pm 3.7$        | $6.0 \pm 0.1$             |

Table 10. Experimental results on *coverage* (% , lower is better ↓). ● denotes the best result among all methods.

| Data          | r  | Schirn       | NLR          | FPML       | PML-LRS    | PML-NI       | P-MAP      | P-VLS      | PAKS         | GLC        | PARD       |
|---------------|----|--------------|--------------|------------|------------|--------------|------------|------------|--------------|------------|------------|
| Music_emotion |    | 40.2 ± 0.7 ● | 42.9 ± 0.7   | 44.9 ± 0.5 | 40.7 ± 0.4 | 40.8 ± 0.3   | 42.0 ± 1.1 | 41.0 ± 0.7 | 40.7 ± 0.4   | 40.6 ± 0.4 | 41.4 ± 0.6 |
| Music_style   |    | 19.3 ± 0.4 ● | 19.7 ± 0.7   | 23.3 ± 0.5 | 20.7 ± 0.8 | 19.8 ± 0.8   | 20.6 ± 0.7 | 20.7 ± 0.8 | 19.9 ± 0.8   | 20.3 ± 0.8 | 20.6 ± 0.8 |
| YeastMF       |    | 35.3 ± 0.8 ● | 38.2 ± 0.9   | 49.1 ± 1.7 | 52.2 ± 1.7 | 45.0 ± 2.1   | 54.4 ± 2.2 | 59.7 ± 1.9 | 40.2 ± 0.7   | 52.6 ± 1.9 | 38.9 ± 3.1 |
| YeastCC       |    | 30.6 ± 0.6 ● | 31.9 ± 0.9   | 44.0 ± 2.1 | 54.5 ± 1.0 | 45.2 ± 1.6   | 53.4 ± 3.1 | 61.6 ± 2.2 | 34.9 ± 0.8   | 53.0 ± 1.3 | 47.8 ± 2.0 |
| YeastBP       |    | 42.9 ± 1.0 ● | 44.8 ± 1.1   | 50.4 ± 1.5 | 68.2 ± 1.0 | 60.4 ± 1.3   | 67.1 ± 1.0 | 74.3 ± 1.3 | 48.5 ± 1.1   | 68.1 ± 1.1 | 51.5 ± 1.0 |
| Scene         | 1  | 7.7 ± 0.3 ●  | 9.3 ± 0.7    | 19.5 ± 2.1 | 15.6 ± 0.8 | 14.5 ± 0.8   | 10.2 ± 0.6 | 10.2 ± 0.6 | 14.1 ± 1.3   | 15.5 ± 0.8 | 15.5 ± 1.9 |
|               | 2  | 8.1 ± 0.6 ●  | 9.7 ± 1.0    | 19.9 ± 1.3 | 20.1 ± 1.1 | 18.8 ± 1.2   | 12.0 ± 1.2 | 11.9 ± 0.7 | 19.1 ± 1.7   | 20.0 ± 1.0 | 20.1 ± 1.3 |
|               | 3  | 9.0 ± 0.8 ●  | 10.8 ± 0.9   | 21.7 ± 2.2 | 25.9 ± 0.5 | 25.0 ± 0.6   | 17.1 ± 0.5 | 16.0 ± 0.3 | 26.0 ± 0.9   | 25.8 ± 0.5 | 25.9 ± 0.5 |
| Birds         | 3  | 26.1 ± 0.5   | 15.6 ± 3.0   | 21.6 ± 3.8 | 16.8 ± 4.1 | 15.6 ± 3.7 ● | 20.7 ± 2.4 | 21.7 ± 1.6 | 18.9 ± 3.6   | 15.7 ± 4.1 | 22.3 ± 1.9 |
|               | 7  | 38.8 ± 2.7   | 19.4 ± 1.4   | 22.3 ± 3.2 | 25.3 ± 3.1 | 22.2 ± 4.0   | 23.7 ± 2.7 | 23.9 ± 3.7 | 20.2 ± 2.9 ● | 24.6 ± 3.6 | 23.2 ± 3.8 |
|               | 11 | 40.2 ± 4.0   | 21.8 ± 3.2   | 24.8 ± 2.1 | 26.1 ± 1.5 | 24.5 ± 2.0   | 28.3 ± 1.8 | 28.4 ± 3.3 | 23.1 ± 1.8 ● | 25.7 ± 1.2 | 24.5 ± 2.1 |
| Medical       | 3  | 3.5 ± 0.8 ●  | 5.0 ± 1.3    | 6.6 ± 1.6  | 6.6 ± 0.6  | 4.0 ± 1.2    | 11.7 ± 1.8 | 11.3 ± 2.4 | 11.5 ± 1.4   | 6.0 ± 0.8  | 4.6 ± 1.2  |
|               | 7  | 5.1 ± 0.6 ●  | 6.6 ± 1.3    | 11.8 ± 1.5 | 16.1 ± 1.2 | 6.2 ± 1.2    | 13.2 ± 1.1 | 13.4 ± 1.4 | 13.4 ± 0.7   | 10.6 ± 0.9 | 6.7 ± 1.4  |
|               | 11 | 5.9 ± 1.0 ●  | 7.8 ± 1.5    | 12.0 ± 2.0 | 22.1 ± 1.7 | 7.3 ± 0.7    | 14.2 ± 1.5 | 13.5 ± 2.0 | 14.2 ± 1.8   | 13.6 ± 1.7 | 7.8 ± 0.8  |
| Enron         | 3  | 24.5 ± 0.6 ● | 26.6 ± 2.1   | 31.2 ± 1.7 | 46.3 ± 2.2 | 36.7 ± 2.8   | 30.6 ± 1.1 | 38.7 ± 1.7 | 26.7 ± 1.8   | 47.3 ± 2.3 | 29.8 ± 2.7 |
|               | 7  | 25.7 ± 0.5 ● | 28.1 ± 2.2   | 33.0 ± 2.7 | 50.7 ± 1.6 | 39.9 ± 2.6   | 32.6 ± 1.6 | 40.2 ± 2.8 | 29.2 ± 1.9   | 49.8 ± 1.8 | 34.2 ± 2.7 |
|               | 11 | 32.3 ± 1.0   | 29.3 ± 1.2 ● | 35.4 ± 1.4 | 55.0 ± 1.3 | 42.7 ± 2.5   | 34.9 ± 1.2 | 40.4 ± 1.5 | 30.6 ± 1.9   | 52.3 ± 1.5 | 36.7 ± 2.4 |
| Chess         | 10 | 24.3 ± 0.9 ● | 26.7 ± 1.2   | 29.9 ± 1.6 | 41.6 ± 1.1 | 36.2 ± 1.2   | 34.7 ± 2.1 | 40.4 ± 3.0 | 29.2 ± 0.6   | 43.2 ± 1.2 | 26.9 ± 0.8 |
|               | 20 | 27.6 ± 0.6 ● | 29.2 ± 1.4   | 32.0 ± 1.6 | 46.5 ± 1.2 | 40.3 ± 0.9   | 38.3 ± 1.5 | 41.2 ± 2.7 | 32.1 ± 1.3   | 46.7 ± 1.2 | 31.6 ± 1.0 |
|               | 30 | 29.2 ± 0.8 ● | 31.0 ± 0.9   | 33.9 ± 1.9 | 49.4 ± 0.8 | 43.1 ± 0.8   | 41.3 ± 1.3 | 44.0 ± 1.8 | 35.0 ± 1.3   | 49.4 ± 0.7 | 33.8 ± 1.3 |
| Philosophy    | 10 | 25.2 ± 0.6 ● | 27.1 ± 1.0   | 29.1 ± 1.0 | 39.8 ± 1.0 | 36.3 ± 1.3   | 34.3 ± 0.9 | 34.4 ± 1.7 | 30.0 ± 1.6   | 40.9 ± 0.9 | 25.5 ± 1.3 |
|               | 20 | 29.6 ± 0.4 ● | 30.3 ± 0.9   | 32.3 ± 0.8 | 43.4 ± 0.6 | 39.8 ± 0.9   | 36.0 ± 1.5 | 36.4 ± 1.6 | 33.5 ± 1.3   | 44.0 ± 0.6 | 30.2 ± 1.6 |
|               | 30 | 31.8 ± 0.2 ● | 32.3 ± 1.2   | 35.1 ± 1.3 | 45.3 ± 0.8 | 41.8 ± 0.9   | 39.3 ± 1.2 | 38.5 ± 1.7 | 36.0 ± 1.6   | 45.8 ± 0.7 | 32.7 ± 1.6 |

Table 11. Experimental results on *hamming loss* (% , the smaller the better ↓). ● denotes the best result achieved among all methods.

| Data          | r  | Schirn       | NLR         | FPML        | PML-LRS    | PML-NI     | P-MAP      | P-VLS       | PAKS        | GLC        | PARD        |
|---------------|----|--------------|-------------|-------------|------------|------------|------------|-------------|-------------|------------|-------------|
| Music_emotion |    | 20.2 ± 0.3 ● | 22.2 ± 0.4  | 23.3 ± 0.2  | 25.6 ± 0.5 | 21.6 ± 0.2 | 22.7 ± 0.4 | 21.2 ± 0.5  | 21.5 ± 0.4  | 21.5 ± 0.2 | 22.0 ± 0.2  |
| Music_style   |    | 11.3 ± 0.2 ● | 12.0 ± 0.3  | 12.4 ± 0.3  | 16.1 ± 3.2 | 11.4 ± 0.2 | 11.7 ± 0.2 | 11.9 ± 0.2  | 11.6 ± 0.2  | 11.5 ± 0.3 | 14.4 ± 0.2  |
| YeastMF       |    | 9.3 ± 0.1    | 10.6 ± 0.7  | 11.7 ± 0.5  | 11.7 ± 0.3 | 10.7 ± 0.2 | 13.3 ± 0.1 | 11.5 ± 0.5  | 10.2 ± 0.2  | 11.3 ± 0.4 | 9.0 ± 0.2 ● |
| YeastCC       |    | 8.3 ± 0.2    | 8.9 ± 0.9   | 9.0 ± 0.3   | 10.8 ± 0.2 | 9.4 ± 0.3  | 11.3 ± 0.4 | 9.5 ± 0.4   | 7.7 ± 0.3 ● | 10.2 ± 0.3 | 8.3 ± 0.2   |
| YeastBP       |    | 3.9 ± 0.1 ●  | 4.6 ± 0.2   | 4.3 ± 0.1   | 5.2 ± 0.1  | 4.8 ± 0.0  | 5.3 ± 0.2  | 4.0 ± 0.1   | 4.2 ± 0.1   | 5.1 ± 0.1  | 3.9 ± 0.1 ● |
| Scene         | 1  | 10.8 ± 0.3 ● | 16.3 ± 2.5  | 20.3 ± 1.1  | 28.8 ± 0.4 | 15.2 ± 0.8 | 11.5 ± 0.7 | 12.8 ± 0.7  | 14.4 ± 1.2  | 15.9 ± 0.9 | 15.7 ± 1.1  |
|               | 2  | 11.7 ± 0.8 ● | 18.6 ± 1.3  | 20.7 ± 0.6  | 29.5 ± 1.6 | 18.7 ± 0.9 | 13.1 ± 0.7 | 14.7 ± 0.5  | 18.5 ± 0.9  | 19.5 ± 0.7 | 17.9 ± 0.2  |
|               | 3  | 16.2 ± 0.5 ● | 21.5 ± 2.1  | 19.8 ± 0.9  | 29.3 ± 1.3 | 23.1 ± 0.4 | 17.3 ± 0.8 | 20.4 ± 0.9  | 23.1 ± 0.7  | 23.6 ± 0.5 | 17.9 ± 0.2  |
| Birds         | 3  | 8.6 ± 0.6 ●  | 10.1 ± 0.6  | 11.7 ± 1.7  | 11.5 ± 1.7 | 10.1 ± 0.6 | 14.6 ± 1.9 | 18.8 ± 2.3  | 11.0 ± 0.5  | 10.3 ± 0.6 | 10.9 ± 2.0  |
|               | 7  | 9.5 ± 0.4 ●  | 13.3 ± 1.0  | 12.2 ± 0.8  | 12.9 ± 4.5 | 12.9 ± 0.7 | 17.6 ± 0.9 | 9.7 ± 0.7   | 11.4 ± 0.6  | 13.2 ± 0.4 | 11.0 ± 2.4  |
|               | 11 | 12.2 ± 1.0 ● | 15.5 ± 1.4  | 13.4 ± 2.2  | 15.4 ± 3.3 | 13.5 ± 0.4 | 17.2 ± 0.8 | 13.3 ± 0.9  | 12.5 ± 0.7  | 13.5 ± 0.5 | 13.6 ± 1.6  |
| Medical       | 3  | 1.0 ± 0.1 ●  | 1.2 ± 0.2   | 2.1 ± 0.1   | 3.9 ± 0.1  | 1.3 ± 0.1  | 3.0 ± 0.2  | 2.1 ± 0.3   | 2.8 ± 0.1   | 1.9 ± 0.1  | 2.6 ± 0.1   |
|               | 7  | 1.2 ± 0.2 ●  | 1.3 ± 0.1 ● | 2.1 ± 0.1   | 3.8 ± 0.1  | 1.7 ± 0.1  | 3.4 ± 0.3  | 2.4 ± 0.1   | 2.9 ± 0.2   | 3.3 ± 0.3  | 2.6 ± 0.1   |
|               | 11 | 1.8 ± 0.1 ●  | 2.3 ± 0.4   | 2.1 ± 0.1   | 3.8 ± 0.1  | 2.2 ± 0.3  | 4.5 ± 0.7  | 2.3 ± 0.3   | 2.8 ± 0.2   | 4.3 ± 0.4  | 2.5 ± 0.1   |
| Enron         | 3  | 4.7 ± 0.2 ●  | 5.4 ± 0.5   | 5.7 ± 0.1   | 11.1 ± 1.4 | 5.4 ± 0.2  | 5.5 ± 0.2  | 6.3 ± 0.2   | 5.3 ± 0.1   | 6.7 ± 0.2  | 5.7 ± 0.1   |
|               | 7  | 4.8 ± 0.2 ●  | 5.4 ± 0.6   | 5.7 ± 0.1   | 12.0 ± 1.3 | 6.0 ± 0.2  | 5.9 ± 0.3  | 6.4 ± 0.2   | 5.3 ± 0.1   | 7.7 ± 0.2  | 5.7 ± 0.2   |
|               | 11 | 4.9 ± 0.2 ●  | 5.6 ± 0.4   | 5.8 ± 0.2   | 10.8 ± 1.6 | 6.7 ± 0.2  | 5.9 ± 0.2  | 6.4 ± 0.2   | 5.3 ± 0.2   | 8.6 ± 0.2  | 5.7 ± 0.2   |
| Chess         | 10 | 1.0 ± 0.0 ●  | 1.1 ± 0.0   | 1.1 ± 0.1   | 9.1 ± 1.7  | 1.4 ± 0.0  | 1.4 ± 0.1  | 1.1 ± 0.0   | 1.1 ± 0.0   | 1.7 ± 0.0  | 1.2 ± 0.0   |
|               | 20 | 1.1 ± 0.1 ●  | 1.2 ± 0.0   | 1.1 ± 0.1 ● | 6.9 ± 1.3  | 1.7 ± 0.0  | 1.5 ± 0.0  | 1.1 ± 0.0 ● | 1.2 ± 0.0   | 2.0 ± 0.0  | 2.0 ± 0.1   |
|               | 30 | 1.1 ± 0.1 ●  | 1.2 ± 0.0   | 1.2 ± 0.1   | 4.7 ± 1.3  | 1.8 ± 0.0  | 1.6 ± 0.0  | 1.1 ± 0.0 ● | 1.2 ± 0.1   | 2.2 ± 0.0  | 3.6 ± 0.1   |
| Philosophy    | 10 | 1.0 ± 0.0 ●  | 1.1 ± 0.0   | 1.0 ± 0.0 ● | 7.2 ± 0.5  | 1.3 ± 0.0  | 1.3 ± 0.0  | 1.0 ± 0.0 ● | 1.0 ± 0.0 ● | 1.5 ± 0.0  | 1.0 ± 0.0 ● |
|               | 20 | 1.0 ± 0.0 ●  | 1.1 ± 0.0   | 1.1 ± 0.0   | 6.3 ± 0.5  | 1.6 ± 0.0  | 1.3 ± 0.1  | 1.0 ± 0.0 ● | 1.2 ± 0.0   | 1.8 ± 0.0  | 1.0 ± 0.0 ● |
|               | 30 | 1.0 ± 0.0 ●  | 1.1 ± 0.0   | 1.1 ± 0.0   | 5.0 ± 0.4  | 1.8 ± 0.0  | 1.4 ± 0.1  | 1.1 ± 0.0   | 1.3 ± 0.0   | 2.0 ± 0.0  | 1.0 ± 0.0 ● |

Table 12. Ablation study of Schirn in terms of *coverage* and *hamming loss* on synthetic datasets (in %). The settings for each synthetic dataset are  $r = 1$  for Scene,  $r = 3$  for Birds, Medical, and Enron, and  $r = 10$  for Chess and Philosophy.

| High Rank | Sparsity | Low Rank | coverage ↓ |            |           |            |            |            | hamming loss ↓ |           |           |           |           |            |
|-----------|----------|----------|------------|------------|-----------|------------|------------|------------|----------------|-----------|-----------|-----------|-----------|------------|
|           |          |          | Scene      | Birds      | Medical   | Enron      | Chess      | Philosophy | Scene          | Birds     | Medical   | Enron     | Chess     | Philosophy |
| ×         | ✓        | ×        | 9.7 ± 0.8  | 32.4 ± 2.2 | 5.1 ± 1.1 | 27.7 ± 1.2 | 26.4 ± 1.3 | 27.5 ± 0.9 | 11.2 ± 0.2     | 9.2 ± 0.5 | 1.1 ± 0.1 | 4.9 ± 0.2 | 1.1 ± 0.0 | 1.0 ± 0.0  |
| ✓         | ×        | ×        | 29.2 ± 2.2 | 46.3 ± 3.3 | 8.6 ± 1.3 | 60.5 ± 2.0 | 63.9 ± 5.4 | 62.4 ± 2.5 | 16.8 ± 0.3     | 9.5 ± 0.6 | 1.1 ± 0.1 | 5.2 ± 0.1 | 1.1 ± 0.0 | 1.0 ± 0.0  |
| ×         | ✓        | ✓        | 9.0 ± 0.7  | 34.7 ± 2.8 | 5.1 ± 1.0 | 27.8 ± 1.4 | 26.2 ± 1.8 | 27.3 ± 0.3 | 11.3 ± 0.5     | 9.7 ± 0.5 | 1.1 ± 0.2 | 5.0 ± 0.2 | 1.1 ± 0.0 | 1.0 ± 0.0  |
| ✓         | ✓        | ×        | 7.7 ± 0.3  | 26.1 ± 0.5 | 3.5 ± 0.8 | 24.5 ± 0.6 | 24.3 ± 0.9 | 25.2 ± 0.6 | 10.8 ± 0.3     | 8.6 ± 0.6 | 1.0 ± 0.1 | 4.7 ± 0.2 | 1.0 ± 0.0 | 1.0 ± 0.0  |

Table 13. Ablation study of Schirm in terms of *one-error* on synthetic data sets. The settings for each synthetic dataset are  $r = 1$  for Scene,  $r = 3$  for Birds, Medical and Enron, and  $r = 10$  for Chess and Philosophy.

| High Rank | Sparsity | Low Rank | <b>one-error</b> ↓ |             |             |             |             |             |
|-----------|----------|----------|--------------------|-------------|-------------|-------------|-------------|-------------|
|           |          |          | Scene              | Birds       | Medical     | Enron       | Chess       | Philosophy  |
| ×         | ✓        | ×        | .282 ± .014        | .508 ± .071 | .138 ± .022 | .226 ± .022 | .463 ± .015 | .484 ± .006 |
| ✓         | ×        | ×        | .602 ± .020        | .550 ± .033 | .164 ± .025 | .326 ± .021 | .992 ± .007 | .840 ± .023 |
| ×         | ✓        | ✓        | .278 ± .018        | .502 ± .070 | .130 ± .026 | .238 ± .017 | .468 ± .032 | .474 ± .014 |
| ✓         | ✓        | ×        | .234 ± .011        | .410 ± .013 | .115 ± .019 | .212 ± .018 | .431 ± .016 | .462 ± .017 |
